# Supplementary material
Source: HighWire-hosted journal article supplement (https://bmjopenquality.bmj.com/highwire/filestream/136121/field_highwire_adjunct_files/1/ds5088.docx)
Supplement: ds5088.docx [file ds5088.docx]

**BASELINE MEASUREMENTS**

**A retrospective review of trop requests from MAU and A&E in RGH in a random week**:

**CONCLUSION:**

1. Total number of trops sent were 213, of which 43 were from MAU and 170 from A &E (figure 1)
2. 153/213 trops were sent for ''possible'' cardiac symptoms and 63% among them were for chest pains (figure 3)
3. 60/213 trops were sent for completely non- cardiac symptoms (figure 3) possibly as a tick box practice
4. Only 19 /213 trops were positive (figure 5)
5. 13/213 positive results were consistent with a cardiac aetiology with a diagnostic yield of only 6.10% (figure 6)
